# Supplementary material for: HexR Transcription Factor Contributes to Pseudomonas cannabina pv. alisalensis Virulence by Coordinating Type Three Secretion System Genes
Source: MDPI journal article supplement (doi:10.3390/microorganisms11041025), 2023-04-14
Supplement: s1 [file s1]

**Table S1.** Bacterial strains and plasmids used in this study

| Bacterial strain or plasmid                                | Relevant characteristics                                                                                                                                                                                                                                                 | Reference or source                                      |
|------------------------------------------------------------|--------------------------------------------------------------------------------------------------------------------------------------------------------------------------------------------------------------------------------------------------------------------------|----------------------------------------------------------|
| <i>E. coli</i> strain                                      |                                                                                                                                                                                                                                                                          |                                                          |
| DH5 $\alpha$                                               | <i>F</i> <sup>-</sup> $\lambda$ : $\phi$ 80dLacZ $\Delta$ M15 $\Delta$ ( <i>lacZYA-argF</i> )U169 <i>recA1 endA1 hsdR17</i> (rK <sup>-</sup> mK <sup>+</sup> ) <i>supE44 thi-1 gyrA relA1 thi pro hsdR<sup>-</sup> hsdM<sup>+</sup> recA</i> [chr::RP4-2-Tc::Mu-Km::Tn7] | Takara bio, Kusatsu, Japan                               |
| S17-1                                                      |                                                                                                                                                                                                                                                                          | Schafer et al. (1994) [29]                               |
| <i>P. cannabina</i> pv. <i>alisalensis</i> ( <i>Pcal</i> ) |                                                                                                                                                                                                                                                                          |                                                          |
| Isolate KB211                                              | Wild type, Rif <sup>r</sup>                                                                                                                                                                                                                                              | Nagano vegetable and ornamental crops experiment station |
| <i>hexR</i> mutant                                         | <i>Pcal hexR</i> mutant, Rif <sup>r</sup> , Km <sup>r</sup>                                                                                                                                                                                                              | Sakata et al. (2019) [20]                                |
| <i>hexR</i> -complemented                                  | <i>Pcal hexR</i> mutant containing pDSKG- <i>hexR</i> , Rif <sup>r</sup> , Km <sup>r</sup> , Gn <sup>r</sup>                                                                                                                                                             | This work                                                |
| <i>P. syringae</i> pv. <i>tomato</i> ( <i>Pst</i> )        |                                                                                                                                                                                                                                                                          |                                                          |
| Isolate DC3000                                             | Wild type, Rif <sup>r</sup>                                                                                                                                                                                                                                              | From Dr. Katagiri                                        |
| $\Delta$ <i>hexR</i>                                       | <i>Pst hexR</i> mutant, Rif <sup>r</sup>                                                                                                                                                                                                                                 | This study                                               |
| Plasmid                                                    |                                                                                                                                                                                                                                                                          |                                                          |
| pGEM-T Easy                                                | Cloning vector, Amp <sup>r</sup>                                                                                                                                                                                                                                         | Promega, Tokyo, japan                                    |
| pK18 <i>mobsacB</i>                                        | Small mobilizable vector, Km <sup>r</sup> , sucrose sensitive ( <i>sacB</i> )                                                                                                                                                                                            | Schafer et al. (1994) [29]                               |
| pDSKG- <i>hexR</i>                                         | The vector containing constitutive <i>psbA</i> promoter and <i>hexR</i> gene inserted into pDSKG, Gn <sup>r</sup>                                                                                                                                                        | This work                                                |

Amp<sup>r</sup> ampicillin resistance, Gn<sup>r</sup> gentamicin resistance, Km<sup>r</sup> kanamycin resistance, Rif<sup>r</sup> rifampicin resistance

**Table S2.** Primer sets used in this study

| Gene               | Primer name  | Primer usage                            | Primer sequence              | Reference                 |
|--------------------|--------------|-----------------------------------------|------------------------------|---------------------------|
| <i>Pst hexR</i>    | PSPTO_1299-1 | Deletion mutagenesis of <i>Pst hexR</i> | GGCCAGTGCCTTGAGCACTT         | This study                |
| <i>Pst hexR</i>    | PSPTO_1299-2 | Deletion mutagenesis of <i>Pst hexR</i> | TGCAACGCTTCTTCCGATCC         | This study                |
| <i>Pst hexR</i>    | PSPTO_1299-3 | Deletion mutagenesis of <i>Pst hexR</i> | CGGGATCCAGGTTTCTTACGCGGTCCAT | This study                |
| <i>Pst hexR</i>    | PSPTO_1299-4 | Deletion mutagenesis of <i>Pst hexR</i> | CGGGATCCGATCGAGGATCAGGGCTGA  | This study                |
| <i>Pcal hrpL</i>   | hrpL-FW      | Expression analysis on <i>Pcal</i>      | CATGCCAGTAAACCGCAAAC         | Sakata et al. (2021) [36] |
| <i>Pcal hrpL</i>   | hrpL-RV      | Expression analysis on <i>Pcal</i>      | GTCTTCCCAGCTTTCCTGATAA       | Sakata et al. (2021) [36] |
| <i>Pcal avrPto</i> | avrPto-FW    | Expression analysis on <i>Pcal</i>      | CATCGATACCTGACCAACGATAC      | This study                |
| <i>Pcal avrPto</i> | avrPto-RV    | Expression analysis on <i>Pcal</i>      | CTCAGTCAGCTTGGTGCTAAT        | This study                |
| <i>Pcal hopM1</i>  | hopM1-FW     | Expression analysis on <i>Pcal</i>      | GGTGCCGATGAAGGCTATT          | This study                |
| <i>Pcal hopM1</i>  | hopM1-RV     | Expression analysis on <i>Pcal</i>      | TTTCGACGGACGCTTTGT           | This study                |
| <i>Pcal avrE1</i>  | avrE1-FW     | Expression analysis on <i>Pcal</i>      | GACAATCAGGGCAGGCTTTA         | This study                |
| <i>Pcal avrE1</i>  | avrE1-RV     | Expression analysis on <i>Pcal</i>      | TGACCTGCCAAGGTGTAATG         | This study                |
| <i>Pcal corR</i>   | corR-FW      | Expression analysis on <i>Pcal</i>      | GGATCGAACGCTGGCAGATA         | Sakata et al. (2021) [36] |
| <i>Pcal corR</i>   | corR-RV      | Expression analysis on <i>Pcal</i>      | GTCTGCTCATGAGTCGCTT          | Sakata et al. (2021) [36] |
| <i>Pcal cfl</i>    | cfl-FW       | Expression analysis on <i>Pcal</i>      | GAACTGGTGGCGTTGTACTAT        | Sakata et al. (2021) [36] |
| <i>Pcal cfl</i>    | cfl-RV       | Expression analysis on <i>Pcal</i>      | GTGGAGCAGATGCTCAATTTTC       | Sakata et al. (2021) [36] |
| <i>Pcal cmaA</i>   | cmaA-FW      | Expression analysis on <i>Pcal</i>      | AAAGCCTACCGCCGATTT           | Sakata et al. (2021) [36] |
| <i>Pcal cmaA</i>   | cmaA-RV      | Expression analysis on <i>Pcal</i>      | CGTCTGGAGCTGTTGATAAGT        | Sakata et al. (2021) [36] |
| <i>Pcal oprF</i>   | oprF-FW      | Expression analysis on <i>Pcal</i>      | GGCTTGGCCATTGGTACTAT         | Sakata et al. (2021) [36] |
| <i>Pcal oprF</i>   | oprF-RV      | Expression analysis on <i>Pcal</i>      | GCGCTGTCGTAATACTCTTTCT       | Sakata et al. (2021) [36] |
| <i>Pcal recA</i>   | recA-FW      | Expression analysis on <i>Pcal</i>      | TCTCTACGGCAAGGGTATCT         | Sakata et al. (2021) [36] |
| <i>Pcal recA</i>   | recA-RV      | Expression analysis on <i>Pcal</i>      | GCTTTACCCTGACCGATCTT         | Sakata et al. (2021) [36] |

BamHI digestion sites are underlined.
