# Supplementary material for: HexR Transcription Factor Contributes to Pseudomonas cannabina pv. alisalensis Virulence by Coordinating Type Three Secretion System Genes
Source: MDPI journal article supplement (doi:10.3390/microorganisms11041025), 2023-04-14
Supplement: s1 [file s1]

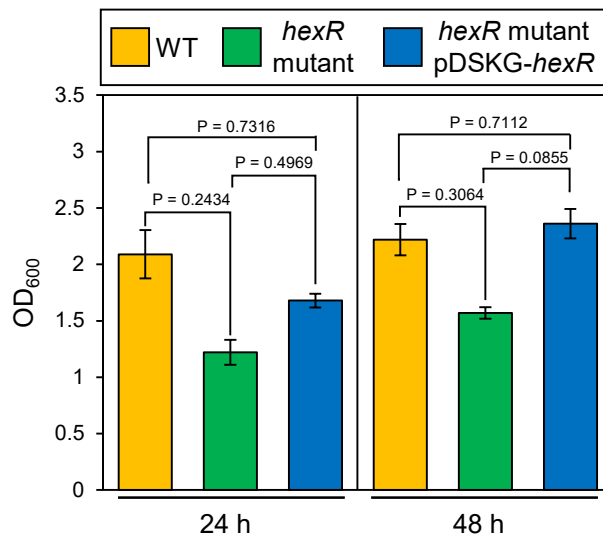

**Supplementary Figure S1. Bacterial populations *in vitro*.** WT and the *hexR* mutant were grown at 28 °C on KB medium. The bacterial suspensions were standardized to an OD<sub>600</sub> of 0.01 with KB broth, and bacterial growth was measured at OD<sub>600</sub> for 24 and 48 h. Vertical bars indicate the standard error for three biological replicates. Statistical analysis was performed using one-way ANOVA with Tukey's HSD test.

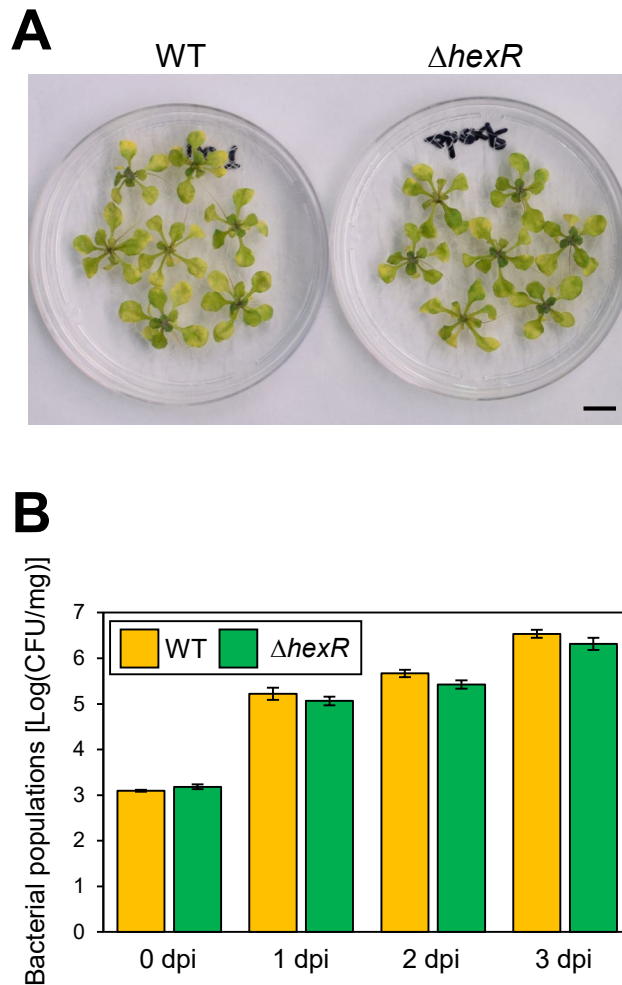

**Supplementary Figure S2. Disease phenotypes and bacterial populations of *Pseudomonas syringae* pv. *tomato* DC3000 WT and the  $\Delta hexR$  mutant in *Arabidopsis thaliana* after flood-inoculation.** Disease symptoms (A) and bacterial populations (B) in *A. thaliana* flood-inoculated with WT and the  $\Delta hexR$  mutant. *A. thaliana* was flood-inoculated with  $1 \times 10^8$  CFU/ml of inoculum containing 0.025% Silwet L-77. Bacterial concentrations in the plant leaves were evaluated at 0, 1, 2, and 3 dpi. The leaves were photographed 3 dpi. Vertical bars indicate the standard error for at least three independent experiments. Different letters indicate a significant difference among treatments based on a Tukey's HSD test ( $p < 0.05$ ). Scale bar shows 1 cm.

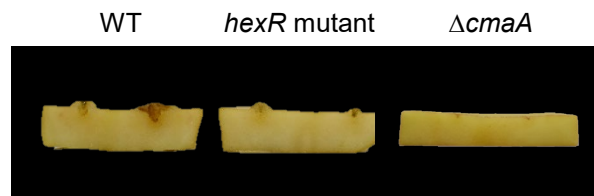

**Supplementary Figure S3. Coronatine quantification of *Pseudomonas cannabina* pv. *alisalensis* KB211 WT, *hexR* mutant, and  $\Delta cmaA$ .** Observation of hypertrophy-inducing activity on potato tuber tissue inoculated with *Pseudomonas cannabina* pv. *alisalensis* WT, *hexR* mutant, and coronatine defective mutants ( $\Delta cmaA$ ). Potato tuber discs were inoculated using toothpicks by placing the tips in the WT, *hexR* mutant, and  $\Delta cmaA$  on a KB medium plate and then placing the toothpick on the potato tuber disc. Photographs were taken at 5 dpi.
